# Supplementary material
Source: PubMed Central journal article supplement (PMC6589768)
Supplement: pnas.1904226116.sapp.pdf [file pnas.1904226116.sapp.pdf]

# Supplementary Information for

## **SR9009 has REV-ERB-independent effects on cell proliferation and metabolism**

Pieterjan Dierickx<sup>a,b</sup>, Matthew J. Emmett<sup>a,b</sup>, Chunjie Jiang<sup>a,b</sup>, Kahealani Uehara<sup>a,b</sup>, Manlu Liu<sup>a,b</sup>, Marine Adlanmerini<sup>a,b</sup>, and Mitchell A. Lazar<sup>a,b,1</sup>

<sup>a</sup>Institute for Diabetes, Obesity, and Metabolism, University of Pennsylvania Perelman School of Medicine, Philadelphia, PA 19104; and <sup>b</sup>Division of Endocrinology, Diabetes, and Metabolism, Department of Medicine, University of Pennsylvania Perelman School of Medicine, Philadelphia, PA 19104

<sup>1</sup>To whom correspondence should be addressed.

Email: [lazar@penncmedicine.upenn.edu](mailto:lazar@penncmedicine.upenn.edu)

**This PDF file includes:**  
Figs. S1 to S5

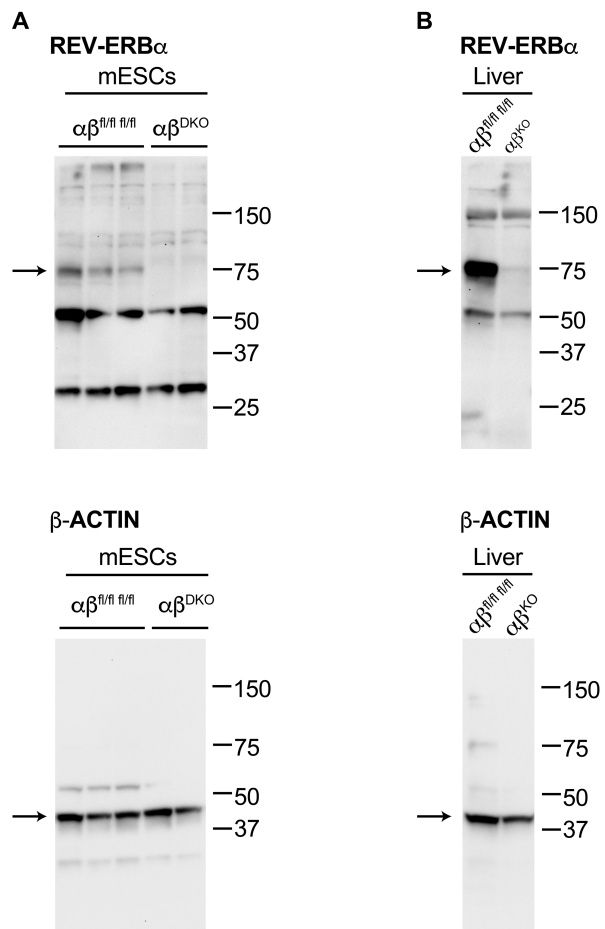

**Fig. S1. Cre-mediated recombination of *Rev-erb $\alpha$*  allele does not lead to altered protein forms.** Full immunoblots for REV-ERB $\alpha$  and  $\beta$ -ACTIN from **(A)** double floxed control (n=3) vs DKO (n=2) mouse ES cells (mESCs) and **(B)** double floxed control vs DKO liver. Arrows denote the full-length protein.

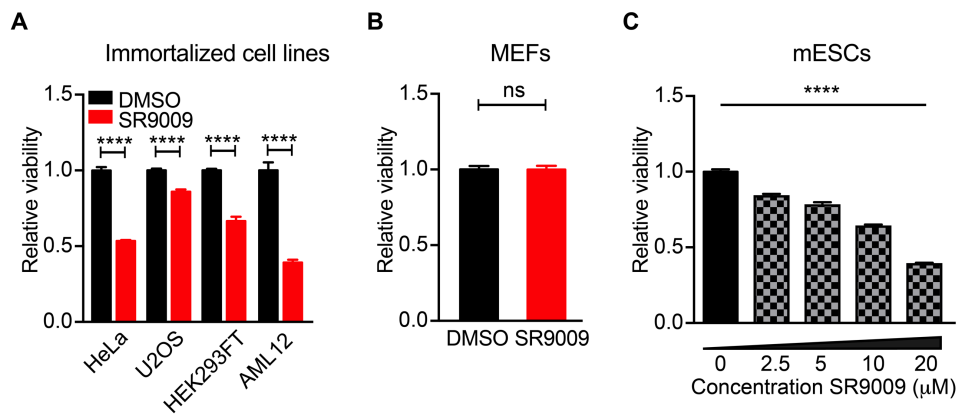

**Fig. S2. SR9009 reduces cell viability of immortalized cell lines and mESCs. (A)** Relative viability of 4 immortalized cell lines ( $n=8$ /condition) treated for 2 days with  $10\mu\text{M}$  SR9009. **(B)** Relative viability of mouse embryonic fibroblasts (MEFs) ( $n=12$ /condition) treated for 2 days with  $10\mu\text{M}$  SR9009, \*\*\*\* $P < 0.0001$ , by two-sided Student's  $t$ -test. ns, not significant. **(C)** Dose-response curve showing relative viability of wild type mESCs treated with varying concentrations of SR9009 for 2 days ( $n=16$ /condition), \*\*\*\* $P < 0.0001$ , by one-way ANOVA. Data are presented as mean  $\pm$ SEM.

mESC viability: SR9009

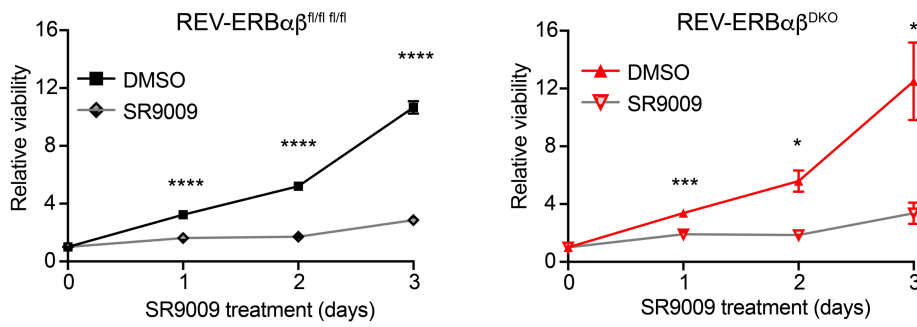

**Fig. S3. Time course of reduced mESC viability by SR9009.** Relative viability of double floxed control (n=5/condition) vs DKO (n=4/condition), treated with 10 $\mu$ M SR9009 for 3 days. \* $P < 0.05$ , \*\*\* $P < 0.005$ , \*\*\*\* $P < 0.0005$ , by two-sided Student's  $t$ -test. Reduced mESC viability is apparent after 1 day. Data are presented as mean  $\pm$ SEM.

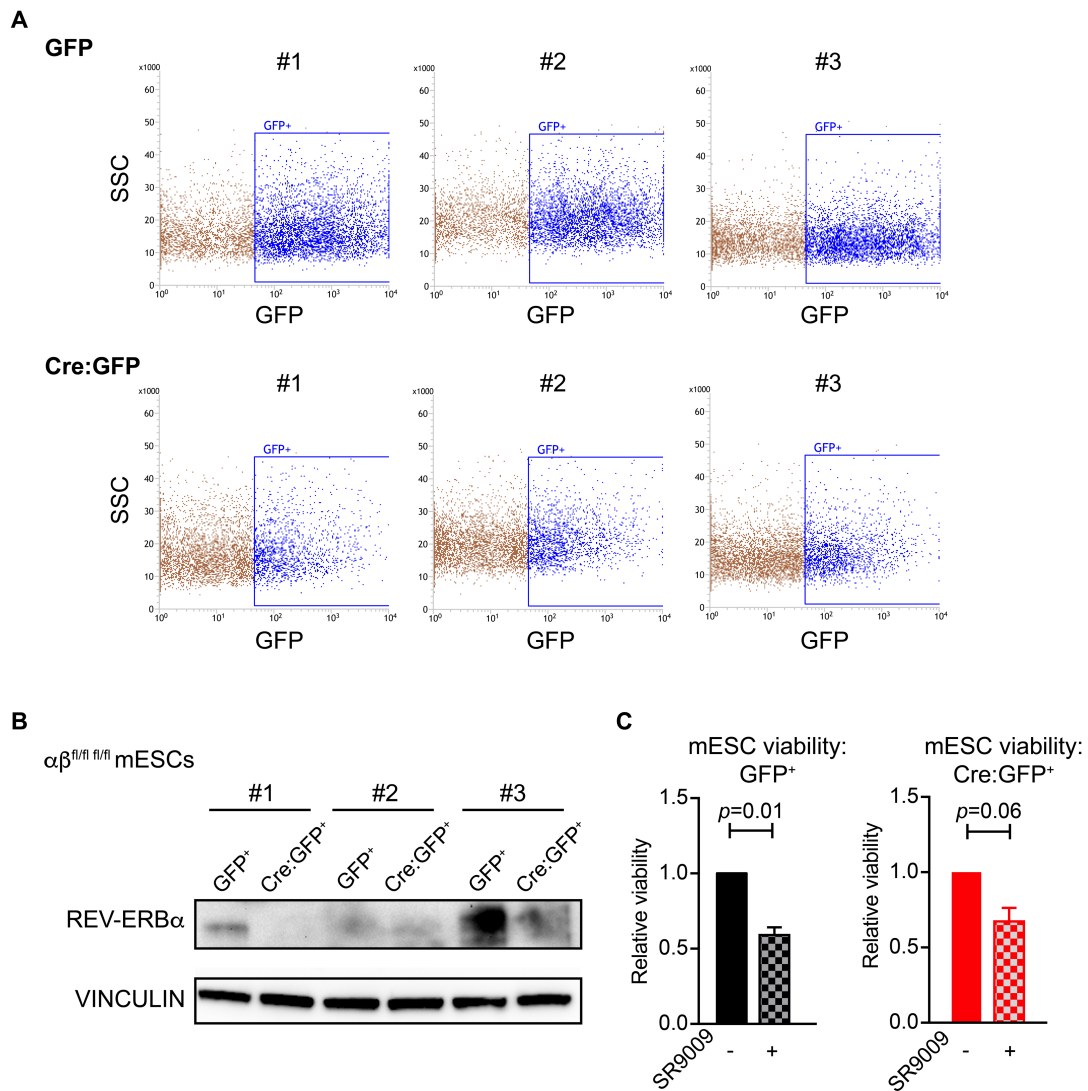

**Fig. S4. Decreased mESC viability after SR9009 treatment is not due to long term culture of REV-ERB-depleted mESCs. (A)** Gating of GFP<sup>+</sup>-sorted REV-ERB $\alpha/\beta$  double floxed mESCs transfected with GFP (control) vs Cre:GFP overexpressing plasmids. **(B)** Immunoblot for REV-ERB $\alpha$  on the sorted cells from (A). **(C)** Relative viability of sorted control (GFP<sup>+</sup>) (n=3 clones/condition) and DKO (Cre:GFP<sup>+</sup>) (n=3/condition) mESCs, treated with 10 $\mu$ M SR9009 for 2 days. *P*-values are determined by two-sided Student's *t*-test. Data are presented as mean  $\pm$ SEM.

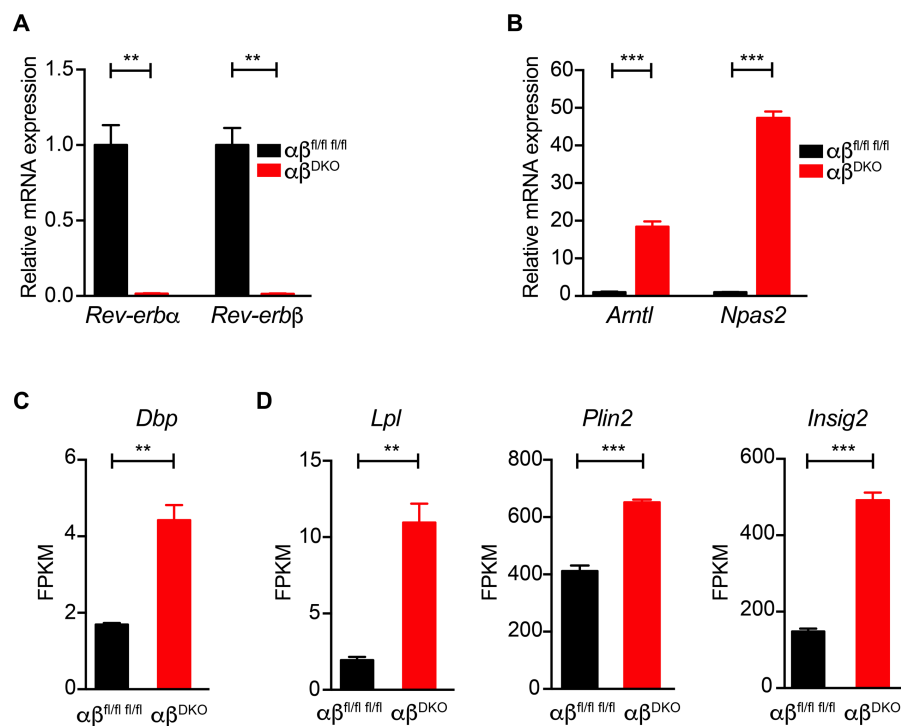

**Fig. S5. Molecular characterization of REV-ERB $\alpha/\beta$  DKO hepatocytes culture ex vivo.** **(A)** Relative *Rev-erb $\alpha/\beta$*  and **(B)** canonical REV-ERB clock target gene (*Arntl* and *Npas2*) mRNA expression in double floxed control vs DKO hepatocytes, measured by qRT-PCR (n=3 per genotype). **(C)** Fragments per kilobase of exon per million reads mapped (FPKM) for clock output (*Dbp*) and for **(D)** metabolic REV-ERB target genes (*Lpl*, *Plin2* and *Insig2*) genes in double floxed control vs DKO hepatocytes, measured by RNA-sequencing. \*\* $P < 0.005$ , \*\*\* $P < 0.0005$ , by two-sided Student's *t*-test. Data are presented as mean  $\pm$ SEM.
